# Supplementary material for: Appressoria Formation in Phytopathogenic Fungi Suppressed by Antimicrobial Peptides and Hybrid Peptides from Black Soldier Flies
Source: MDPI journal article supplement (doi:10.3390/genes14051096), 2023-05-17
Supplement: s1 [file s1]

Figure S1 Locations of the 34 genes encoding antimicrobial peptides in chromosome

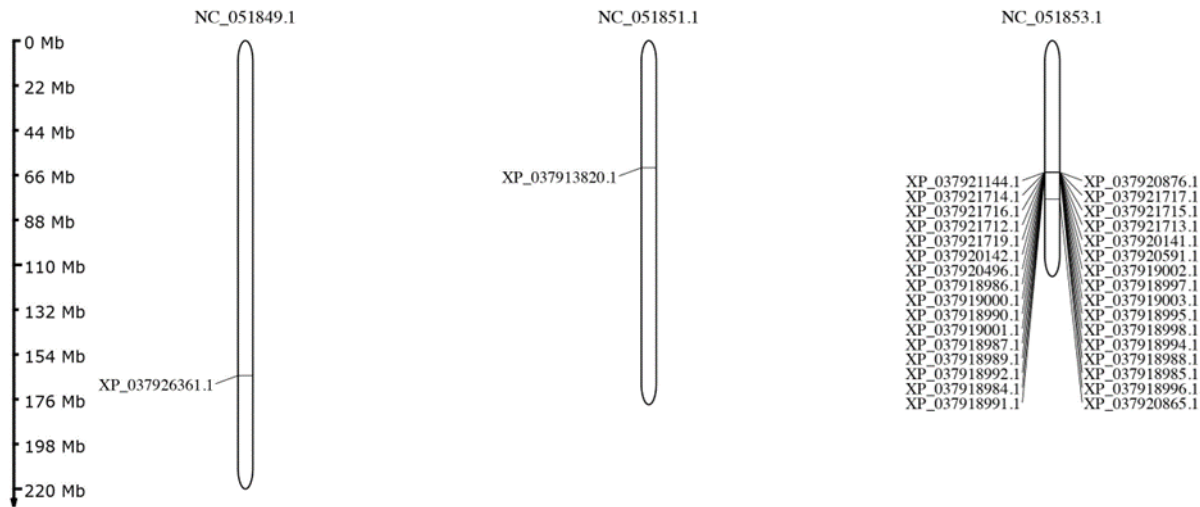

Figure S2 Mass spectrogram results of seven synthesized CAD peptides

生工® Sangon Biotech

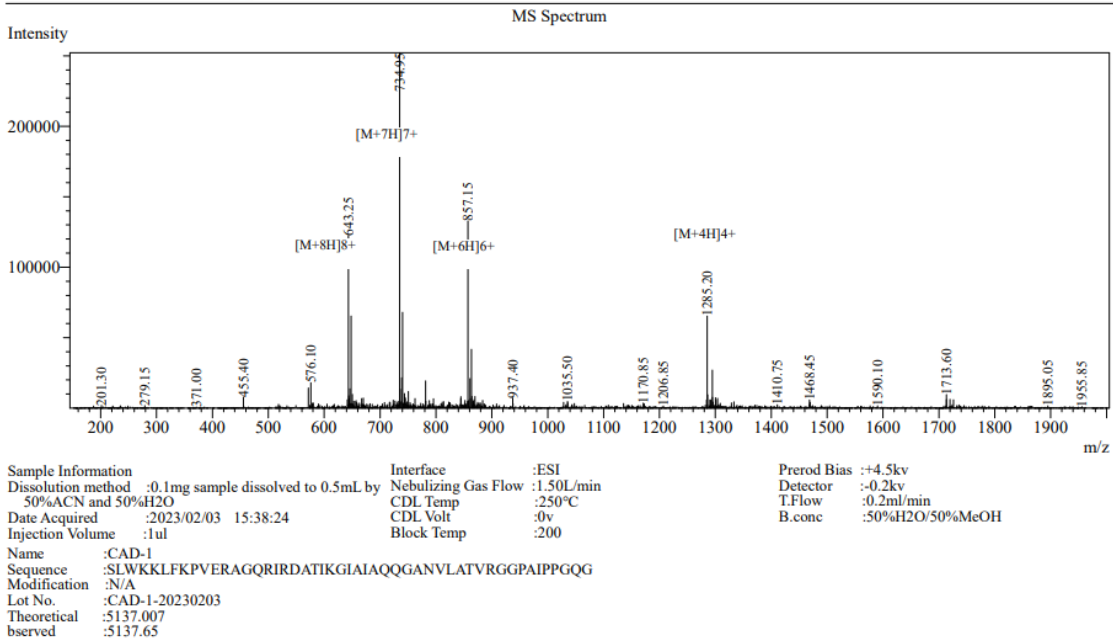

生工生物工程（上海）股份有限公司

地址：上海市松江区香闵路698号  
电话/Tel: 400-821-0268  
邮箱/Email: Sales@sangon.com

Add: 698 Xiang Min Road Songjiang Shanghai China  
传真/Fax: 86-21-37772170  
网址/Web: www.sangon.com

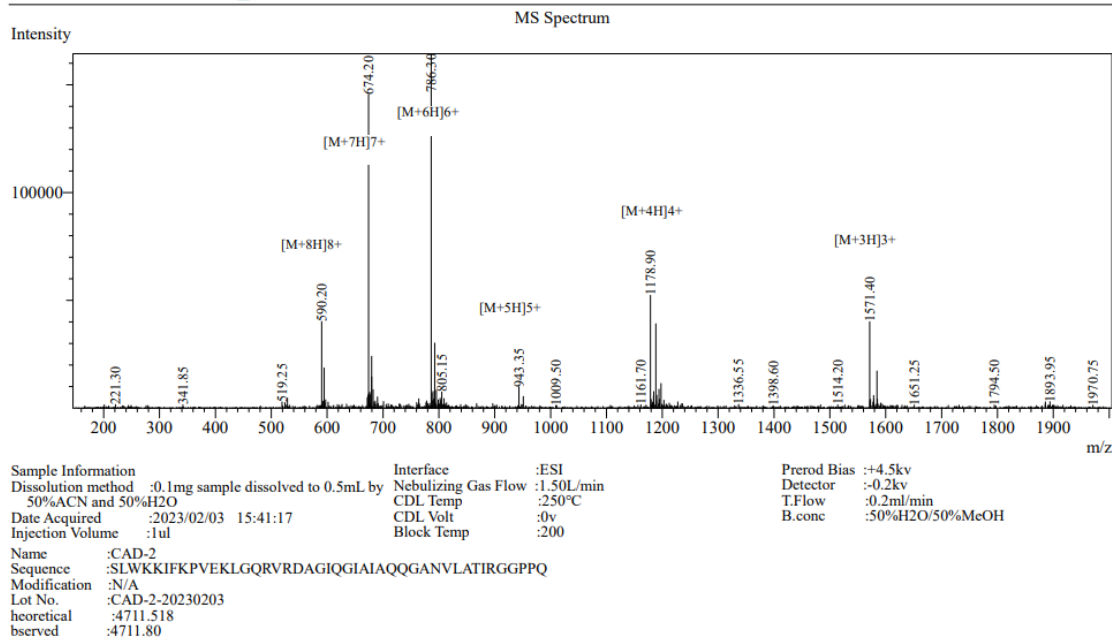

生工生物工程（上海）股份有限公司

地址：上海市松江区香闵路698号

电话/Tel: 400-821-0268

邮箱/Email: Sales@sangon.com

Add: 698 Xiang Min Road Songjiang Shanghai China

传真/Fax: 86-21-37772170

网址/Web: www.sangon.com

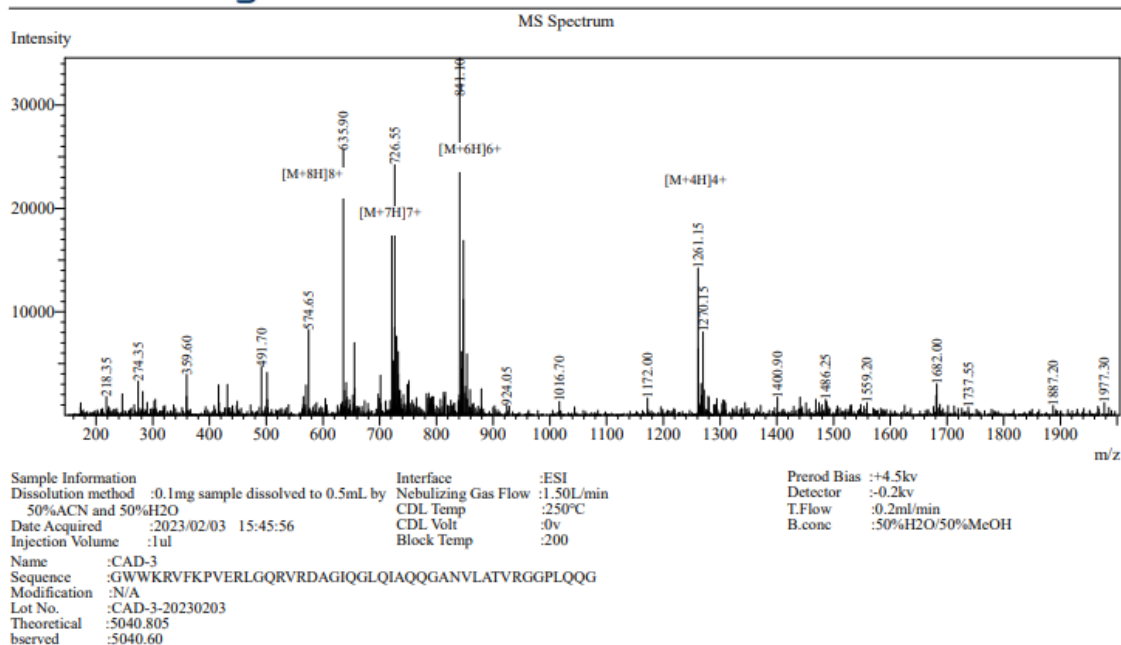

生工生物工程（上海）股份有限公司

地址：上海市松江区香闵路698号

电话/Tel: 400-821-0268

邮箱/Email: Sales@sangon.com

Add: 698 Xiang Min Road Songjiang Shanghai China

传真/Fax: 86-21-37772170

网址/Web: www.sangon.com

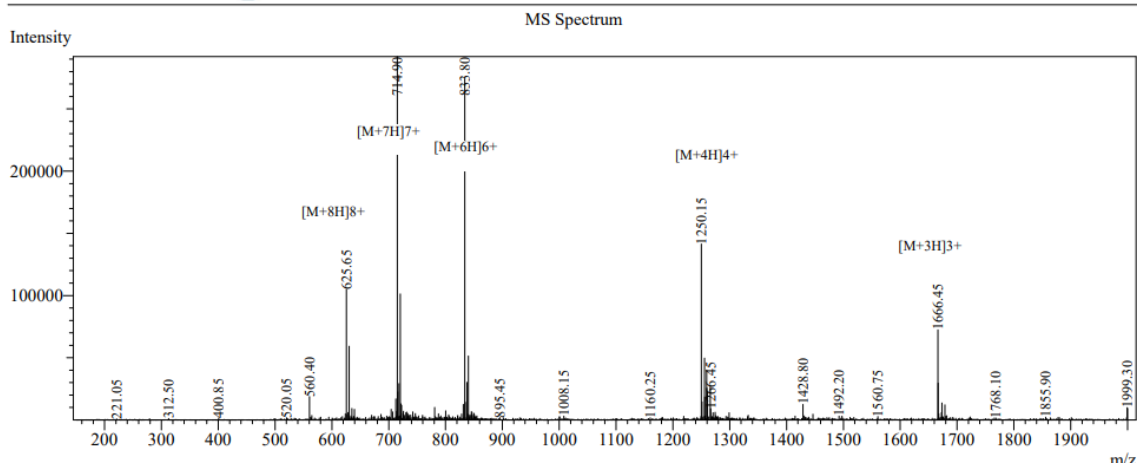

|                                                          |  |                                     |                     |             |                 |
|----------------------------------------------------------|--|-------------------------------------|---------------------|-------------|-----------------|
| Sample Information                                       |  | Interface                           | :ESI                | Prerod Bias | :+4.5kv         |
| Dissolution method                                       |  | :0.1mg sample dissolved to 0.5mL by | Nebulizing Gas Flow | :1.50L/min  | Detector        |
| 50%ACN and 50%H2O                                        |  |                                     | CDL Temp            | :250°C      | T.Flow          |
| Date Acquired                                            |  | :2023/02/03 15:55:36                | CDL Volt            | :0v         | B.conc          |
| Injection Volume                                         |  | :1ul                                | Block Temp          | :200        | :50%H2O/50%MeOH |
| Name :CAD-7                                              |  |                                     |                     |             |                 |
| Sequence :GWWKRVFKPVEKLGQRVRDAGIQGLQIAQQGANVLATVRGGPPQQG |  |                                     |                     |             |                 |
| Modification :N/A                                        |  |                                     |                     |             |                 |
| Lot No. :CAD-7-20230203                                  |  |                                     |                     |             |                 |
| Theoretical :4996.744                                    |  |                                     |                     |             |                 |
| bserved :4997.20                                         |  |                                     |                     |             |                 |

生工生物工程（上海）股份有限公司

|                            |                                                  |
|----------------------------|--------------------------------------------------|
| 地址: 上海市松江区香闵路698号          | Add: 698 Xiang Min Road Songjiang Shanghai China |
| 电话/Tel: 400-821-0268       | 传真/Fax: 86-21-37772170                           |
| 邮箱/Email: Sales@sangon.com | 网址/Web: www.sangon.com                           |

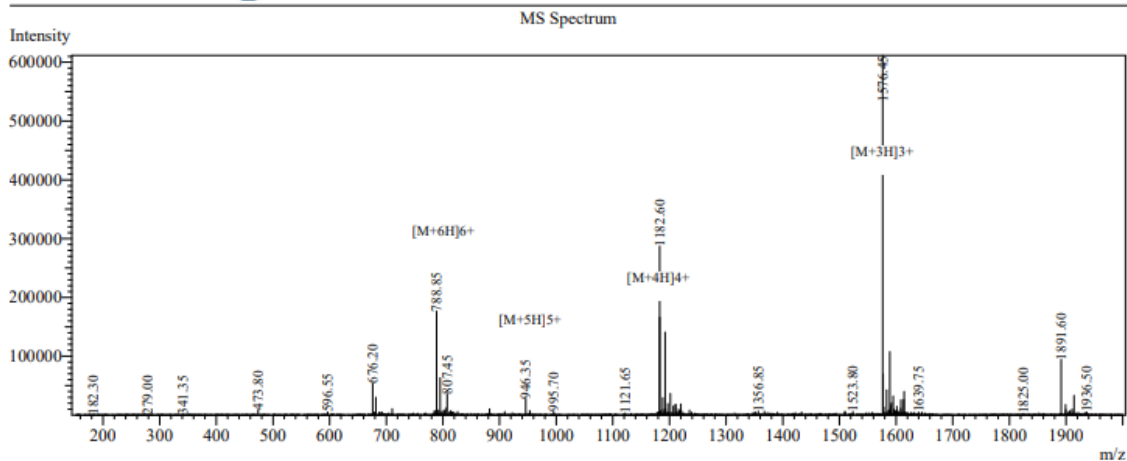

|                                                        |  |                                     |                     |             |                 |
|--------------------------------------------------------|--|-------------------------------------|---------------------|-------------|-----------------|
| Sample Information                                     |  | Interface                           | :ESI                | Prerod Bias | :+4.5kv         |
| Dissolution method                                     |  | :0.1mg sample dissolved to 0.5mL by | Nebulizing Gas Flow | :1.50L/min  | Detector        |
| 50%ACN and 50%H2O                                      |  |                                     | CDL Temp            | :250°C      | T.Flow          |
| Date Acquired                                          |  | :2023/02/03 15:50:16                | CDL Volt            | :0v         | B.conc          |
| Injection Volume                                       |  | :1ul                                | Block Temp          | :200        | :50%H2O/50%MeOH |
| Name :CAD-5                                            |  |                                     |                     |             |                 |
| Sequence :GWWKRVFKPVEKLGQRVRDAGIQGLQIAQQGANVLATVRGGPPQ |  |                                     |                     |             |                 |
| Modification :N/A                                      |  |                                     |                     |             |                 |
| Lot No. :CAD-5-20230203                                |  |                                     |                     |             |                 |
| heoretical :4726.491                                   |  |                                     |                     |             |                 |
| bserved :4726.35                                       |  |                                     |                     |             |                 |

生工生物工程（上海）股份有限公司

|                            |                                                  |
|----------------------------|--------------------------------------------------|
| 地址: 上海市松江区香闵路698号          | Add: 698 Xiang Min Road Songjiang Shanghai China |
| 电话/Tel: 400-821-0268       | 传真/Fax: 86-21-37772170                           |
| 邮箱/Email: Sales@sangon.com | 网址/Web: www.sangon.com                           |

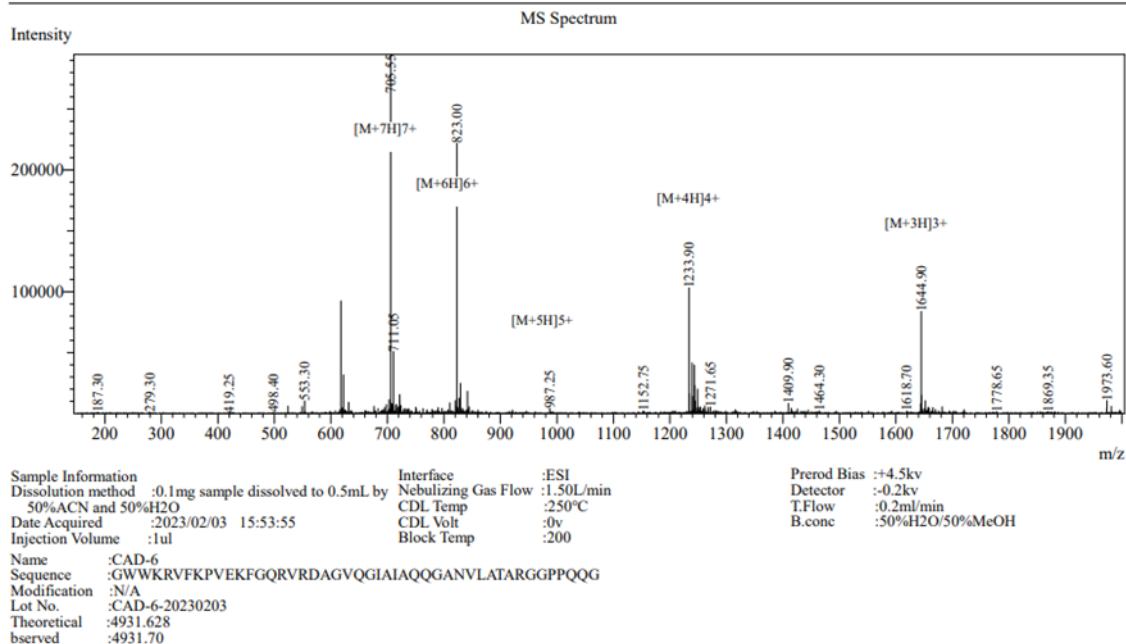

生工生物工程（上海）股份有限公司

地址：上海市松江区香闵路698号  
电话/Tel: 400-821-0268  
邮箱/Email: Sales@sangon.com

Add: 698 Xiang Min Road Songjiang Shanghai China  
传真/Fax: 86-21-37772170  
网址/Web: www.sangon.com

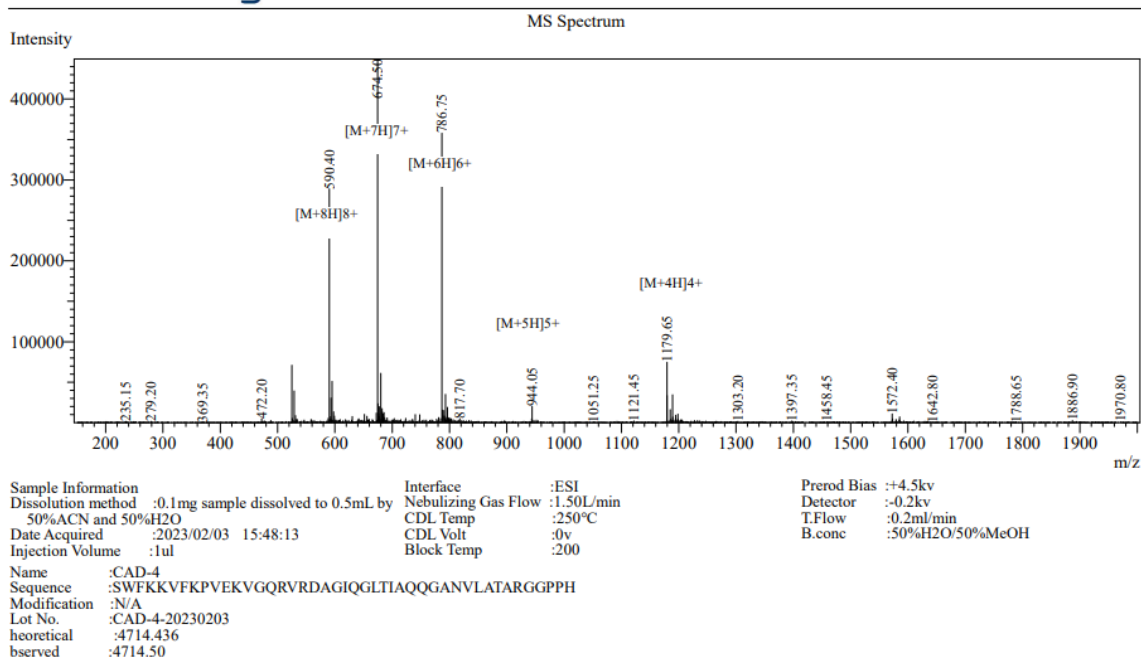

生工生物工程（上海）股份有限公司

地址：上海市松江区香闵路698号  
电话/Tel: 400-821-0268  
邮箱/Email: Sales@sangon.com

Add: 698 Xiang Min Road Songjiang Shanghai China  
传真/Fax: 86-21-37772170  
网址/Web: www.sangon.com

Table S1 The Rename of the BSF AMPs.

| GenBank        | Sequence                                         | Rename |
|----------------|--------------------------------------------------|--------|
| XP 037921713.1 | SLWKKLFPVERAGQRIRDATIKGIAIAQQGANVLATVRGGPAIPPGQG | CAD1   |
| XP 037921717.1 | SLWKKIFKPVEKLGQRVRDAGIQGIAIAQQGANVLATIRGGPPQ     | CAD2   |
| XP 037918997.1 | GWWKRVFKPVERLGQRVRDAGIQGLQIAQQGANVLATVRGGPLQQG   | CAD3   |
| XP 037920142.1 | SWFKKVFKPVEKVGQRVRDAGIQGLTIAQQGANVLATARGGPPH     | CAD4   |
| XP 037920591.1 | GWWKKVFKPVEKLGQRVRDAGIQGIAIAQQGANVLATVRGGPPQ     | CAD5   |
| XP 037918984.1 | GWWKRVFKPVEKFGQRVRDAGVQGIAIAQQGANVLATARGGPPQQG   | CAD6   |
| XP 037918991.1 | GWWKRVFKPVEKLGQRVRDAGIQGLQIAQQGANVLATVRGGPPQQG   | CAD7   |

Table S2 Basic characterization data of seven mature CAD peptides

| Name | Number of amino acids | Molecular weight | Theoretical pI | Hydrophilicity |
|------|-----------------------|------------------|----------------|----------------|
| CAD1 | 49                    | 5.137 KDa        | 11.58          | hydrophobic    |
| CAD2 | 44                    | 4.711 KDa        | 11.07          | hydrophobic    |
| CAD3 | 46                    | 5.04 KDa         | 11.83          | hydrophobic    |
| CAD4 | 44                    | 4.714 KDa        | 11.07          | hydrophobic    |
| CAD5 | 44                    | 4.726 KDa        | 11.07          | hydrophobic    |
| CAD6 | 46                    | 4.931 KDa        | 11.57          | hydrophobic    |
| CAD7 | 46                    | 4.996 KDa        | 11.57          | hydrophobic    |

Table S3 Oligonucleotide sequences used in this study

| Primer Name | Primer Sequence (5'→3')    | Primer length (bp) |
|-------------|----------------------------|--------------------|
| Actin-F     | CAACGAGCGATTCAAGGTGTCC     | 21                 |
| Actin-R     | GAGTGCGGTGATTCCTTCTGC      | 22                 |
| CAD1-F      | ATGAATTTCTCAAAGCTTCTCATCG  | 25                 |
| CAD1-R      | TTATCCTTGTCCGGGGGAATTGCT   | 25                 |
| CAD5-F      | ATGAATTTCACTAAACTTTTGTG    | 25                 |
| CAD5-R      | TTATTGTGGTGGTCCACCTCGAACC  | 25                 |
| CAD7-F      | ATGAACTTCACAAAGCTTTTCGTCAT | 26                 |
| CAD7-R      | TTATCCTTGTGGGGTGGTCCACCT   | 25                 |
| Actin-qRT-F | CAACGAGCGATTCAAGGTGT       | 19                 |
| Actin-qRT-R | GAGTGCGGTGATTCCTTCT        | 20                 |
| CAD1-qRT-F  | ATGAATTTCTCAAAGCTTC        | 19                 |
| CAD1-qRT-R  | TTATCCTTGTCCGGGGGAA        | 20                 |
| CAD2-qRT-F  | ATGAACCTTCACAAAGCTTT       | 19                 |
| CAD2-qRT-R  | TTATTGTGGTGGGCCTCCTC       | 20                 |
| CAD5-qRT-F  | ATGAATTTCACTAAACTTT        | 19                 |
| CAD5-qRT-R  | TTATTGTGGTGGTCCACCTC       | 20                 |
| CAD3-qRT-F  | ATGAATTCGCAAAGCTTT         | 20                 |
| CAD3-qRT-R  | TTATCCTTGTGGAGTGGTC        | 20                 |
| CAD7-qRT-F  | ATGAACCTTCACAAAGCTTT       | 19                 |
| CAD7-qRT-R  | TTATCCTTGTGGGGTGGTC        | 20                 |

Table S4 Amino acid sequence of CAD-Con.

---

|                                                                       |
|-----------------------------------------------------------------------|
| GWKKVFKPVEKLGQRVRDAGIQGIAIAQQGANVLATVRGGPPQGWKRVFKPVEKLGQRVRDAGI      |
| QGLQIAQQGANVLATVRGGPPQQGSLWKKLFKPVERAGQRIRDATIKGIAIAQQGANVLATVRGGPAIP |
| PGQG                                                                  |

---
